# Supplementary material for: Sequencing of natural strains of Arabidopsis thaliana with short reads
Source: HighWire-hosted journal article supplement (doi:10.1101/gr.080200.108), 2008-09-25
Supplement: Ossowski_2008_SOM_re-resubmission.pdf [file Ossowski_2008_SOM_re-resubmission.pdf]

## **Supplemental Information**

### **Sequencing of natural strains of *Arabidopsis thaliana* with short reads**

Stephan Ossowski, Korbinian Schneeberger, Richard M. Clark,  
Christa Lanz, Norman Warthmann, and Detlef Weigel

## SUPPLEMENTAL METHODS

### Biological material, library preparation, and SBS sequencing

Seed stocks for Col-0, Bur-0, and Tsu-1 were from sibling plants of those used for the resequencing array study (Arabidopsis Biological Resource Center stock numbers CS22681, CS22679, and CS22693) (Clark et al. 2007). Leaves from ~150 three-week old plants were ground in liquid N<sub>2</sub>, and genomic DNA was purified from one gram of leaf powder with the DNeasy Plant Maxi Kit (cat. no. 68163; Qiagen Inc., Valencia, CA). From 500 ng of DNA, single-end SBS libraries were prepared with the 1 DNA Sample Kit (cat. no. FC-102-1001; Illumina Inc., San Diego, CA). Briefly, DNA was sheared by nebulization for 6 minutes with N<sub>2</sub> gas at a pressure of 32 psi. End repair of sheared fragments, addition of an A residue to the 3' end of blunted fragments, and ligation of adaptors was according to manufacturer's instructions. The entire adaptor-modified DNA was amplified by PCR for 18 cycles with the supplied PCR primers 1.1 and 1.2 and resolved on a 2% agarose gel (including 400 ng/ml ethidium bromide) run in TAE buffer for 60 minutes at 120 volts. Fragments of between ~120 to 170 bp were excised under illumination from a Dark Reader (Clare Chemical Research, Dolores, CO). DNA was isolated with a Gel Extraction Kit (Qiagen, Hilden, Germany) and quantified with a NanoDrop Spectrophotometer (Pheqlab Biotechnologie GmbH, Germany). Diluted DNA was stored at -20°C as a 10 nM stock in EB buffer (Qiagen) supplemented with 0.1% Tween-20.

### Cluster preparation on flow cells and SBS sequencing

Clusters were produced with the Cluster Generation Kit (cat. no. FC-103-1002I; Illumina) on a Cluster Station (cat no. SY-301-2001; Illumina) using the "One\_step\_full\_protocol\_v3.0". Libraries were calibrated with dilution series. With an 18 pM solution of denatured DNA, ~30,000 to 35,000 raw clusters per tile were generated on the flow cell surface. Subsequently, we aimed for 35,000 clusters per tile for production sequencing. In total, we used 38, 27, and 16 lanes for Bur-0, Tsu-1, and Col-0, respectively, which includes pilot and production runs. Sequencing was performed on a Genome Analyzer (cat. no. SY-301-1001; Illumina) using the 36 Cycle Solexa Sequencing Kit (cat. no. FC-104-1003; Illumina). The .xml file for recipe "1GSequencing36cycles\_v103.xml" was modified to allow extension and imaging of 40 cycles.

### Oversampled regions

We analyzed the genome for regions with a 10-fold or higher increase of observed compared to expected coverage and identified between 239 and 262 kb per accession. To join *oversampled* regions in close proximity, we extended each seed until the observed coverage dropped below 5- fold the expected coverage. This identified between 345 to 385 kb of oversampled regions per accession. We found that 318 kb of this was shared between all samples.

### Genome coverage estimation

We assessed genome coverage per accession as the read coverage averaged over all non-repetitive positions (Table 1). For Col-0, the reference accession, few sequence differences are present relative to the reference,

and the confounding effect of polymorphism in mapping reads does not complicate the coverage estimate. For Bur-0 and Tsu-1, the coverage estimates reported in Table 1 are underestimates, as some reads cannot be mapped to the reference sequence in polymorphic regions (e.g., Table 5). Employing the number of quality filtered reads and estimated genome coverage for Col-0, and extrapolating with the number of quality filtered reads for Bur-0 and Tsu-1, the estimated genome coverages for Bur-0 and Tsu-1 are 25.1 and 19.4, respectively. Uncertainties in read quality between runs potentially affect this extrapolation, as would any large-scale differences in genome size between accessions (e.g., for centromeric content). Nevertheless, these calculations suggest that the coverage estimates reported in Table 1 for Bur-0 and Tsu-1 only marginally underestimate the true coverage depths.

### Performance of SHORE by sequence type

To assess SHORE performance for SNP predictions by sequence type, we classified each of the 2,896 SNPs in the Bur-0 dideoxy data as either coding or noncoding according to the TAIR7 *A. thaliana* genome annotation available at <http://www.arabidopsis.org/>. Specificity and sensitivity were calculated as for all SNPs (cf. Table S1).

### SNP prediction with MAQ

We downloaded the Mapping and Assembly with Qualities (MAQ) software package from <http://maq.sourceforge.net/>. We converted the Illumina raw quality (*prb*) values to the FASTQ format that is defined by the Sanger Institute and recommended for MAQ (<http://maq.wiki.sourceforge.net/FASTQ+Format>). We employed the parameter sets presented in Table S3. For the SHORE, MAQ-unfiltered, and MAQ-filtered predictions, sensitivity and specificity were calculated as presented in Table S1.

### Overlap of SBS and resequencing array PR predictions

To assess the quality of our SBS PR predictions, we examined overlap to resequencing array PR predictions generated in another study, but with the same accessions (Zeller et al. 2008). The overlap was measured as the position-wise percentage of SBS PR positions that had also been annotated as polymorphic in the resequencing array predictions. The overlap was 75% and 72% for Bur-0 and Tsu-1, respectively. To assess the likelihood of obtaining these overlap values by chance, for each accession we shifted the SBS PR predictions 1,000 times by a random offset, recalculating the overlap to the array PR predictions each time. The resulting distribution is shown in Figure S8 along with the observed values.

### Validation of targeted assemblies by PCR and dideoxy sequencing

To assess the quality of *de novo* assemblies (Fig. 3), we amplified 192 respective regions from Bur-0 genomic DNA by PCR and dideoxy sequenced the resulting products. Primers for PCR were selected with Primer3 (Rozen and Skaletsky 2000) to be within the flanking (anchoring) 100 bp on either side of targeted indels. The annealing temperature thresholds were 59 and 62°C. Where primer design was successful, we classified the predicted PCR products as either short ( $\leq 250$  bp) or long ( $> 250$  bp). Within the short and long classes, we randomly selected 96 contigs each for evaluation. Our rationale for selecting a long class was that long contigs

are more challenging for assembly (e.g., long inserted sequences), and a completely random selection would have been biased towards smaller indels.

For validation attempts, we used the identical Bur-0 DNA sample as employed for SBS library construction (see Methods). We employed touchdown PCR as follows: 95°C for 2 min, followed by 1 cycle of 95°C for 15 sec, 63°C for 30 sec, and 72°C for 1.5 min, followed by 10 additional cycles as before but with decreasing annealing temperatures of 0.5°C per cycle, followed by 32 cycles of 95°C for 15 sec, 58°C for 30 sec, and 72°C for 1.5 min, followed by 72°C for 3 min. PCR-reactions included 1 µl of DNA at 1 ng/µl and 2 µl each of forward and reverse primers at 5 µM in 15 µl reactions with Pfu DNA polymerase (MBI Fermentas) according to manufacturer's instructions. The presence of PCR product was assessed by agarose gel electrophoresis. For the few cases where products were absent, another PCR amplification attempt was performed with the same touchdown PCR program, template, and primers, but using Extaq<sup>TM</sup> polymerase (TaKaRa). The PCR products were diluted 1:15 (short contigs) or 1:10 (long contigs) and analyzed by dideoxy-sequencing on a 3730XL capillary sequencer (Applied Biosystems). Forward and reverse reads were generated for each PCR product with the same primers used for amplification.

Of 192 PCR attempts (short and long), 188 were successful. The resulting sequence trace files were processed with the Staden package (Staden et al. 2000). Reads were quality clipped with *pregap4*, forward and reverse reads for each product were assembled using the *gap4* assembler, and resulting assemblies were manually curated. The sequences obtained by dideoxy-sequencing of all 188 PCR products were identical to the contigs predicted by targeted *de novo* assembly.

### Expected coverage calculation

Apart from stochastic effects and sequence divergence, the expected coverage at a position given an overall sequence coverage is affected by (i) repeat content (reads in repeats cross map, increasing coverage) and by (ii) biases in the sequencing method (e.g., effects of GC content; Supplemental Figs. S3 and S4). To approximate the expected coverage at a position  $p$ , we first took the full set of 36-mers generated from the reference sequence, and aligned these to the genome with four Hamming distances (0 to 3). All mappings were recorded, and from this we calculated, for each position, four repeat content values  $rc_{p_h}$  defined as

$$rc_{p_h} = \max(0, (oc_{p_h} - 36)/36),$$

where  $oc_{p_h}$  is the observed coverage at position  $p$  applying Hamming distance  $h$  in the experiment. Second, as we observed that GC content was strongly and positively associated with per-position coverage, a bias in the method, we further defined the average GC content  $gc_p$  for each position  $p$  as the percentage GC content of all unambiguous bases in a window of 101 bp centered on  $p$ . From the experimental read mappings for each sample, we calculated the observed average coverage  $ac_{gc}$  for all occurring GC contents  $gc_p$ . Combining these three values, we estimated by sample the expected per-position coverage  $ec_p$  as

$$ec_p = \{d + (d \times rs_p)\} \times (ac_{gc_p} / 36),$$

where  $d$  is the sample-dependent sequencing depth, and where  $rs_p$  is the repeat scaling factor calculated as

$$rs_p = rc_{p[am]} + \left\{ (rc_{p[am]} - rc_{p[am]}) \times (am - [am]) \right\},$$

where  $am$  is the average number of mismatches of all reads overlapping  $p$  in the observed data.

### Detection of duplicated regions and comparison to hybridization data

We used both coverage and sequence criteria to identify unique regions of the reference genome sequence that are present in approximately 2-3 copies in Bur-0 and Tsu-1. First, we identified all contiguous positions of at least 250 in length in non-repetitive regions for which the observed per position read coverage was between 1.2 to 3 fold the accession corrected expected coverage,  $ec_p$ . Second, and subject to the quality rules employed for base calling, we identified positions for which two bases were supported with relative frequencies each between 20 to 80%. These copy variable positions, or CVPs, are expected to result where similar but not identical sequences map to the same single copy region in the reference sequence. Heterozygosity would also produce a similar pattern; however, this is unlikely to have affected assignment of CVPs in our study as the accessions we used were highly homozygous as established by dideoxy sequencing at more than 1,200 loci spaced at regular intervals throughout the genome (Nordborg et al. 2005). We classified as duplicated regions those which met the elevated coverage criteria and that had at least one CVP.

To assess the quality of duplicated region predictions, we employed the resequencing array data (Clark et al. 2007). Unfortunately, resequencing microarray data is highly noisy, confounding use of quantitative intensity measures to directly detect additional copies of a sequence. We therefore assessed the quality of CVP predictions that lie within the predicted duplicated regions. Here, the relative intensities among probe sets at individual tiled positions corresponding to CVPs are expected to reflect copy number variation (i.e., probes querying two bases will hybridize at similar intensities if a region is duplicated). To remove the high fraction of positions for which the array data was not informative, we filtered positions for which, in the array data, the sum of the first and second most intense probes was 600 or more in both the accession with the CVP and in Col-0 on either the forward or reverse tiled strands. Where both strands in a sample met this criterion, data from one of the strands was randomly chosen. Further, we only considered those CVPs for which, from the aligned read data, the upstream and downstream 12 bp were predicted to be identical to Col-0. This requirement assured that the probe hybridization data was not affected by a polymorphism other than the CPV itself; the resequencing array probes were 25 bp in length, and off-center polymorphisms strongly inhibit hybridization (Clark et al. 2007; Zeller et al. 2008). For positions that met these criteria, we calculated *chastity* values corresponding to the intensity of maximally hybridizing probe divided by the intensities of the first and second most intensely hybridizing probes (a double peak therefore gives a value of ~0.5, while a single peak gives a higher value). With these selection criteria, we identified a set of 2042 CVPs in Bur-0 and 2172 CVPs in Tsu-1 for which

resequencing array data was available, including for Col-0. As assessed with the chastity values, double peaks were readily apparent at CVPs in the divergent accessions as compared to Col-0 (Fig. 4 and Supplemental Fig. S9; compare patterns of hybridization at the CVP positions shaded in yellow to adjacent positions).

### Effects on genes

We assessed the effects of SNPs, 1-3 bp indels, and PRs of at least 100 bp (Tables 4 and 5) on coding (CDS) gene models from the TAIR7 annotation. For SNPs and PRs, annotation of polymorphisms was as described by Clark et al. (2007), and the method was extended for small indels (e.g., to identify frameshift changes). We also examined the distribution of major-effect changes for a subset of large gene families previously examined with the resequencing array data (Clark et al. 2007; see Supplemental Tables S7 and S8 therein). Major-effect changes are as defined in Supplemental Table S10, and genes were classified by family using gene descriptions in the TAIR7 release with the search terms in the first columns of Supplemental Tables S11 and S12.

**SUPPLEMENTAL REFERENCES**

- Clark, R.M., Schweikert, G., Toomajian, C., Ossowski, S., Zeller, G., Shinn, P., Warthmann, N., Hu, T.T., Fu, G., Hinds, D.A. et al. 2007. Common sequence polymorphisms shaping genetic diversity in *Arabidopsis thaliana*. *Science* **317**: 338-342.
- Dong, Q., Schlueter, S.D., and Brendel, V. 2004. PlantGDB, plant genome database and analysis tools. *Nucleic Acids Res* **32**: D354-359.
- Nordborg, M., Hu, T.T., Ishino, Y., Jhaveri, J., Toomajian, C., Zheng, H., Bakker, E., Calabrese, P., Gladstone, J., Goyal, R. et al. 2005. The pattern of polymorphism in *Arabidopsis thaliana*. *PLoS Biol.* **3**: e196.
- Rozen, S. and Skaletsky, H. 2000. Primer3 on the WWW for general users and for biologist programmers. *Methods Mol. Biol.* **132**: 365-386.
- Staden, R., Beal, K., and Bonfield, J. 2000. The Staden package, 1998. *Methods Mol. Biol.* **132**: 115-130.
- Zeller, G., Clark, R.M., Schneeberger, K., Bohlen, A., Weigel, D., and Ratsch, G. 2008. Detecting polymorphic regions in the *Arabidopsis thaliana* genome with resequencing microarrays. *Genome Res.* **18**: 918-929.

## SUPPLEMENTAL TABLES

**Table S1.** Results from performance evaluations for SHORE and MAQ as assessed against 2,806 known SNPs in the nonrepetitive fraction of the Bur-0 dideoxy data.

| SNPs by ascertainment method      | Counts and performance calculations | Evaluation metric |
|-----------------------------------|-------------------------------------|-------------------|
| Dideoxy sequenced SNPs            | 2,806                               | TP + FN           |
| SHORE total predictions           | 2,373                               | TP + FP           |
| MAQ-unfiltered total predictions  | 2,800                               | TP + FP           |
| MAQ-filtered total predictions    | 1,911                               | TP + FP           |
| SHORE correct SNPs                | 2,357                               | TP                |
| MAQ-unfiltered correct SNPs       | 2,448                               | TP                |
| MAQ-filtered correct SNPs         | 1,855                               | TP                |
| SHORE <i>Specificity</i>          | 99.3%                               | TP / (TP + FP)    |
| SHORE <i>Sensitivity</i>          | 84.0%                               | TP / (TP + FN)    |
| MAQ-unfiltered <i>Specificity</i> | 87.4%                               | TP / (TP + FP)    |
| MAQ-unfiltered <i>Sensitivity</i> | 87.2%                               | TP / (TP + FN)    |
| MAQ-filtered <i>Specificity</i>   | 97.1%                               | TP / (TP + FP)    |
| MAQ-filtered <i>Sensitivity</i>   | 66.1%                               | TP / (TP + FN)    |

SHORE predictions were generated as detailed in the Methods (see also Table S2), and the MAQ-unfiltered and MAQ-filtered predictions were generated as described in Supplemental Methods (see also Table S3). TP, true positive; FP, false positive; FN, false negative.



**Table S2.** Parameters used for base calling for genome-wide predictions.

| Accession | Prediction type  | Min. read support <sup>a</sup> | Min. core reads | Call % | Max. allowed coverage <sup>b</sup> |
|-----------|------------------|--------------------------------|-----------------|--------|------------------------------------|
| Bur-0     | Reference        | 3                              | 1               | 80     | 120                                |
|           | SNP              | 3                              | 1               | 80     | 120                                |
|           | 1-3 bp deletion  | 3                              | 1               | 67     | 120                                |
|           | 1-3 bp insertion | 3                              | 1               | 67     | 120                                |
| Tsu-1     | Reference        | 3                              | 1               | 80     | 90                                 |
|           | SNP              | 3                              | 1               | 80     | 90                                 |
|           | 1-3 bp deletion  | 3                              | 1               | 67     | 90                                 |
|           | 1-3 bp insertion | 3                              | 1               | 67     | 90                                 |
| Col-0     | Reference        | 3                              | 1               | 80     | 80                                 |
|           | SNP              | 3                              | 1               | 80     | 80                                 |
|           | 1-3 bp deletion  | 3                              | 1               | 67     | 80                                 |
|           | 1-3 bp insertion | 3                              | 1               | 67     | 80                                 |

<sup>a</sup>For Bur-0 subsampling, the minimum read support was varied from 1 to 6 with the other parameters as given (cf. Fig. 2).

<sup>b</sup>Coverage was selected to be at most 5 times the genome-wide coverage depth for which a given accession was sequenced (Table 1).

Note: Repetitive and/or oversampled positions, organellar repeats, and bases ambiguous in the reference sequence were excluded from predictions.

**Table S3.** Preprocessing, mapping, SNP detection and filtering for prediction with MAQ.**Preprocessing:**

```
maq fasta2bfa reference.fa reference.bfa
```

```
maq fastq2bfq reads.fastq reads.bfq
```

**Mapping and SNP detection:**

```
maq map -n 4 -m 0.005 -C 513 out.aln.map reference.bfa reads.bfq 2> out.map.log
```

|          |                                              |
|----------|----------------------------------------------|
| -n 4     | Comparable number of allowed mismatched      |
| -m 0.005 | Polymorphism rate is roughly 1 SNP in 200 bp |
| -C 513   | Infinite number of mappings allowed          |

```
maq mapmerge all.out.aln.map out.aln.map.1 out.aln.map.2
```

```
maq indelsoa reference.bfa all.out.aln.map > out.indel.soa
```

```
maq assemble -t 0.5 -r 0 -m 4 out.cns reference.bfq all.out.aln.map 2> out.cns.log
```

|        |                                                       |
|--------|-------------------------------------------------------|
| -t 0.5 | Reduced to account for the not existing heterozygotes |
| -r 0   | No heterozygote sites expected                        |
| -m 4   | Comparable number of mismatches                       |

```
maq cns2snp out.cns > out.snp
```

**Filtering**

```
maq.pl SNPfilter -D 125 -w 4 out.snp > filtered.snp
```

|        |                                                                                          |
|--------|------------------------------------------------------------------------------------------|
| -D 125 | Comparable maximum coverage criteria for oversampled regions                             |
| -w 4   | Mask SNPs nearby potential indels, set to the number of bp defining the non-core region. |

Parameters that were changed from the default settings are indicated with explanations/justifications (right). MAQ-unfiltered predictions were produced as described above but excluding the “Filtering” step indicated (bottom). The MAQ-filtered predictions included all steps.

**Table S4.** Concordance of Col-0 predictions with SBS data from Bur-0 and Tsu-1 and with Col-0 resequencing array data.

| Prediction type and status                     | <i>N</i> | Agreement with Col-0 base calls<br>from resequencing arrays <sup>a</sup> |     |    | Concordance<br>with array data |
|------------------------------------------------|----------|--------------------------------------------------------------------------|-----|----|--------------------------------|
|                                                |          | <i>n</i>                                                                 | Yes | No |                                |
| Col-0 substitutions:                           |          |                                                                          |     |    |                                |
| Polymorphic in Bur-0 and/or Tsu-1 <sup>b</sup> | 963      | 408                                                                      | 404 | 4  | 99.0%                          |
| Reference in Bur-0 and/or Tsu-1 <sup>c</sup>   | 74       | 30                                                                       | 22  | 8  | 73.3%                          |
| Other <sup>d</sup>                             | 135      | 34                                                                       | 30  | 4  | 88.2%                          |
| Col-0 insertions:                              |          |                                                                          |     |    |                                |
| Polymorphic in Bur-0 and/or Tsu-1 <sup>b</sup> | 721      | NA                                                                       | NA  | NA | NA                             |
| Reference in Bur-0 and/or Tsu-1 <sup>c</sup>   | NA       | NA                                                                       | NA  | NA | NA                             |
| Other <sup>d</sup>                             | 80       | NA                                                                       | NA  | NA | NA                             |
| Col-0 deletions:                               |          |                                                                          |     |    |                                |
| Polymorphic in Bur-0 and/or Tsu-1 <sup>b</sup> | 451      | NA                                                                       | NA  | NA | NA                             |
| Reference in Bur-0 and/or Tsu-1 <sup>c</sup>   | 8        | NA                                                                       | NA  | NA | NA                             |
| Other <sup>d</sup>                             | 27       | NA                                                                       | NA  | NA | NA                             |

<sup>a</sup>Comparisons are to base calls for Col-0 from whole-genome resequencing microarrays using the identical Col-0 accession (stock number CS22681; Clark et al. 2007). Comparisons are only reported where base calls from the forward and reverse strand resequencing array probe quartets agreed and the mean quality score was greater than or equal to 15 (see Clark et al. 2007).

<sup>b</sup>Where both Bur-0 and Tsu-1 agreed with the Col-0 prediction, or where one agreed and the other was ambiguous ('N', or missing data).

<sup>c</sup>Where both Bur-0 and Tsu-1 agree with the reference sequence, or where one is reference and the other was ambiguous ('N', or missing data).

<sup>d</sup>Where data was missing from both Bur-0 and Tsu-1, or, e.g., where more than two sequence predictions were made across the accession trio (e.g., triallelic predictions).

NA, not applicable.

**Table S5.** SNPs, small indels, and reference base calls in moderately repetitive regions.

| Accession(s)               | SNPs   | Indels |      |      |       | Ref. base calls (%) <sup>b</sup> |
|----------------------------|--------|--------|------|------|-------|----------------------------------|
|                            |        | 1 bp   | 2 bp | 3 bp | All   |                                  |
| Col-0                      | 47     | 13     | 0    | 0    | 13    | 61.24                            |
| Bur-0 <sup>a</sup>         | 20,795 | 1,081  | 107  | 21   | 1,209 | 46.27                            |
| Tsu-1 <sup>a</sup>         | 18,047 | 941    | 69   | 16   | 1,026 | 43.07                            |
| Non-redundant <sup>a</sup> | 35,610 | 1,866  | 162  | 31   | 2,056 | NA                               |

**Table S6.** Comparison of Col-0 PRs to known mis-assemblies, resequencing hybridization data, and the Bur-0 and Tsu-1 PR predictions.

| Chr | Start      | End        | PRs | Included bp | Known mis-assembly <sup>a</sup> | Array hybridization quality for Col-0                         | Bur-0 and Tsu-1 PRs                               |
|-----|------------|------------|-----|-------------|---------------------------------|---------------------------------------------------------------|---------------------------------------------------|
| 1   | 14,511,399 | 14,866,522 | 31  | 3,350       | No                              | 4 long regions with low quality, highly repetitive in between | overlapping                                       |
| 1   | 15,438,047 | 15,438,687 | 1   | 641         | No                              | low                                                           | equal                                             |
| 2   | 3,624,495  | 3,624,982  | 1   | 488         | Vector                          | low                                                           | equal                                             |
| 3   | 1          | 104        | 1   | 104         | Vector                          | low                                                           | equal                                             |
| 3   | 13,748,172 | 13,748,766 | 6   | 291         | Vector                          | low                                                           | overlapping                                       |
| 3   | 13,754,115 | 13,760,800 | 2   | 67          | Vector                          | low                                                           | equal                                             |
| 5   | 11,202,838 | 11,246,080 | 40  | 15,541      | Vector                          | 14 regions with low quality, highly repetitive in between     | PRs of >50 equal & including vector contamination |
| 5   | 12,846,176 | 12,851,904 | 6   | 1,670       | No                              | 3 long regions with low quality, highly repetitive in between | equal                                             |

<sup>a</sup>Defined as nearby or overlapping sequences with high sequence similarity to cloning vectors (Dong et al. 2004).

**Table S7.** Validation of targeted assemblies as assessed with PCR and dideoxy sequencing.

| ID <sup>a</sup> | Validation type | Forward, reverse primers (5' to 3') for validation attempt | Amplified and sequenced? | Sequence identical to prediction? |
|-----------------|-----------------|------------------------------------------------------------|--------------------------|-----------------------------------|
| LCR_71          | short           | ACTGATCTGGAAGAATGATGCAGT,<br>GTCACGTGTAATGACATCGGGTTT      | yes                      | yes                               |
| LCR_77          | short           | ATCTCATGTTGTGCACTCAGTTGT,<br>CTCTTCAAGGGATACACCAAAGAT      | yes                      | yes                               |
| LCR_137         | long            | GCGAGAAGCTCGGAACAAA,<br>ACTATTCTCCGCCTCTAAATAGTCTTG        | yes                      | yes                               |
| LCR_164         | long            | GGACAAAGAAGGATTTGGGTATC,<br>TCGATGAGTTCATTCTTGCTG          | yes                      | yes                               |
| LCR_214         | long            | AATTTTGAGATCTACGTTAAGCCATC,<br>GAAATTCGATTTGCGACCAC        | yes                      | yes                               |
| LCR_229         | long            | ACTCTGGCTCTGCCTCTGAATA,<br>GAAATGTTTCTGTAATCCAATCCA        | yes                      | yes                               |
| LCR_331         | long            | TCTGAGAAATGGTGTGCGATAA,<br>CCTAAACTAACTACAACATTAGGTCTCG    | yes                      | yes                               |
| LCR_339         | long            | GCTCAACTCTCCCTAACCACCTA,<br>TATTGTCAGCATAAGCTAAGAGTGAGT    | yes                      | yes                               |
| LCR_349         | short           | ATACAGGAGCGCTTGCCAATA,<br>TAGTATCATGAACCAACCATCTCTACA      | yes                      | yes                               |
| LCR_373         | long            | AAAATTTGCTTAGCCGTTTCG,<br>AGACACCACCACACTGGTCACT           | yes                      | yes                               |
| LCR_377         | long            | ATCTTCTTATTCAAATGGGTCGAG,<br>GCGATACTTGAGGAAAATGTGAA       | yes                      | yes                               |
| LCR_455         | short           | AACTGGGAAAACGCGTGAA,<br>CATTGATTCTTCAAGCCAAG               | yes                      | yes                               |
| LCR_461         | short           | CAGATACCATATGTGTCAAGCTTACTTT,<br>TCTAGATGGAAGGTCGGGATAC    | yes                      | yes                               |
| LCR_478         | long            | CAACTAATGCTTCCAAGTTAGCTTTT,<br>CATTTTCACCTCCAGTAACAAAGA    | yes                      | yes                               |
| LCR_536         | long            | GTATTTTGTTGACAATAGTTCGTCCAT,<br>ACAACGTTCTTTTCACGTCTGTC    | yes                      | yes                               |
| LCR_552         | long            | CCAATCAACGTGGTATATTTTCG,<br>GTTTCTTATGCTTTGTGTTTCAAGTG     | yes                      | yes                               |
| LCR_564         | short           | GCAAATTTACGAAGTTAGCCCAAT,<br>GGAGGTGTATGAACCGACAAAT        | yes                      | yes                               |
| LCR_611         | short           | ACATTGCTTTAGTTATAGCCTGGATT,<br>AGCCGTGCAGAGCTTATCA         | yes                      | yes                               |
| LCR_637         | long            | CTCCTTCACTCACACCATCAAA,<br>TTAGGACCTTCAACCTAAGAACAAA       | yes                      | yes                               |
| LCR_669         | short           | GTAAACTACCGAGTGTATCCTTCTCC,<br>TTTACGTACATGGAATGTTCTTGATG  | yes                      | yes                               |
| LCR_688         | long            | GAGATAGTTATGTTTCATCCTTTGTCC,<br>CTGTGACCACTTTCTCTCTAGC     | yes                      | yes                               |
| LCR_690         | long            | GATCTTTGCTGGGAAGACCA,<br>TACTATCGACAAGAATTCATCCATAAG       | yes                      | yes                               |
| LCR_739         | long            | TACCCGGCCCCAGTGTATTT,<br>AGTCCATGACTGATGCCAAGTAT           | yes                      | yes                               |
| LCR_787         | long            | AATGCATCCCTCAGGCAAC,<br>TTTTATGGGCTTCTCTATTGTAAAAGG        | yes                      | yes                               |
| LCR_874         | long            | TCAGGTTGAGACAATATCACACG,                                   | yes                      | yes                               |

|          |       |                                                              |     |     |
|----------|-------|--------------------------------------------------------------|-----|-----|
|          |       | GTAATCTAGTATTGAGAGATGGGCCTAA                                 |     |     |
| LCR_882  | short | CCTCCACAGGCTTCCTCAAT,<br>ATCTTGGGATCGAGCCTACAAC              | yes | yes |
| LCR_922  | long  | AGTCAATAGTGAGTTGTTTGCTATCC,<br>TGCTACAAAACCTTGGGAACCTAC      | yes | yes |
| LCR_929  | long  | ATGTGCGAGTACATACCTAAAACAGTA,<br>AGATGCTCCTGCACCATTTG         | yes | yes |
| LCR_973  | short | ATTTTGTTTCAGTCCATATGATTTCG,<br>CACGTGAACACATCGTTTTATG        | yes | yes |
| LCR_976  | long  | GAGGCATACGAGCGCTTAAT,<br>TTGTATGGGATTGACTTTACTTCTCC          | yes | yes |
| LCR_1007 | long  | GTCTCCTTTTATCCTGTAATTCAAACA,<br>AAAACCAGGCCAACATCTCAA        | yes | yes |
| LCR_1013 | long  | GAAATTACGCGGAAGACGATG,<br>TGCTATGTCGGCAAAGAGG                | yes | yes |
| LCR_1066 | short | TGACTAACCAAAGAGTGGATGC,<br>GTGTTAGATAGAGCTTAGGAAAGACAAA      | yes | yes |
| LCR_1080 | short | AGCTTCTTCTCTCATTGTCTCTCCT,<br>TTTGTTTCCCAGTTTGAGTGGGA        | yes | yes |
| LCR_1124 | long  | GGGTGAATGGAGCTCACAGA,<br>CATGTGCGATGCCTGCTCA                 | yes | yes |
| LCR_1138 | long  | AGCTTTTGTCTACTTTTCTTCTCTG,<br>TTGGTGCTTTTGTTTTGCTTG          | yes | yes |
| LCR_1139 | long  | CGATTAGGTCAAGGAAGTAACCTTT,<br>GTGGCACGTGAGTTTTAGATT          | yes | yes |
| LCR_1150 | short | CTTGCTCAAGAAATAAACCTAGAAC,<br>TCCATAAACTCTTTGGTGGATCA        | yes | yes |
| LCR_1159 | long  | TCGCAAGCCGTTCTTTTACT,<br>AAATTGGATGAATGTTACGATGAC            | yes | yes |
| LCR_1212 | long  | AAACAGAAATACCTGACCTTCTACTC,<br>TGGCTCGTGAAATCGAAGT           | yes | yes |
| LCR_1268 | short | AACTCCCGGAATGTGGCTTA,<br>GCCTTAGCATTGGATTTAGATGAG            | yes | yes |
| LCR_1284 | short | AGCAGCTTCACAGGATACCTTTT,<br>CACTATATAATTGTTGACGAACCGAAT      | yes | yes |
| LCR_1329 | long  | TTCTCCACAGATTACTTGGCGTAG,<br>TTTATGTGTCCCTACTAACTCATGGAT     | yes | yes |
| LCR_1359 | long  | ACCTGGTGCTCGGATTGATT,<br>TCCTCGACATCCTGCAACA                 | yes | yes |
| LCR_1366 | long  | GAGATCGTGACACTCATCACAATTA,<br>TAAATAACTGGACTGAAAGAAGTGTGTC   | yes | yes |
| LCR_1419 | short | CACAGCATTAACACAACCCTCA,<br>AGTAGCTGAATTTGATTTGCAGGA          | yes | yes |
| LCR_1483 | long  | CTTCTGGTTTTCAACAATTGCAT,<br>GATTGAGATAACAAAGTGTCCACCA        | yes | yes |
| LCR_1487 | short | ATTAATCTATTGATGGTGTCCATTGTC,<br>AAGGGTTTTCTACAACCTATATGGAATG | yes | yes |
| LCR_1493 | short | ATTTATCTTCCCCAACACTGCTTT,<br>TGGCTTCCTCTAAGACATGTACAAAC      | yes | yes |
| LCR_1517 | long  | TTTTGTCTCTGCTTGTTCCTTAATCTC,<br>GGTCAGTCTCTTTGTTTCAAGTTGTC   | yes | yes |
| LCR_1581 | long  | TGTGACACCTTTTCTTGATTTCAGAT,<br>TTTATGCTCTTCATTGACATTGCT      | yes | yes |
| LCR_1604 | long  | ACCTTAGGAAACAATGTAACCTATTCCAG,<br>TCCATCGGTGTTGGATTGAT       | yes | yes |
| LCR_1619 | long  | AGTATGGAGGAGACTCGTTGATTG,<br>TTCATCTTCCCTAGCTGAACTCC         | yes | yes |

|          |       |                                                             |     |     |
|----------|-------|-------------------------------------------------------------|-----|-----|
| LCR_1656 | short | CAACGCATGCAGTACCTTAAAA,<br>TCTTTGAATCCTTGTGTTGTATCG         | yes | yes |
| LCR_1808 | short | AAAACCTTAGTACCTCTCGAATGCTTTA,<br>CTATTTCCCTTGCCGAAGATG      | yes | yes |
| LCR_1855 | long  | TAGACCCAGTCAACTAACAGAACAGA,<br>AGACGTTGGGGAATGTTAAAGAG      | yes | yes |
| LCR_1921 | long  | CTAAACCAAACCAATCGCAAAAC,<br>TATGTGTGAGTGTGTCTTGTAAAGAGTGT   | yes | yes |
| LCR_1949 | short | AGATACTTCTTACTTACCCACAAAGC,<br>GGTAAATTATCCTGCCAAGAAAGG     | yes | yes |
| LCR_1963 | long  | CTCATCCTCTCCGTCATCTTCT,<br>CTAGGGTTCCAGTTAGAGCTGATT         | yes | yes |
| LCR_1988 | long  | AGCTGGCCCTAGGAGACAAA,<br>TTTGACTGTCTCTCTTCTTCTCACAAT        | yes | yes |
| LCR_2011 | short | AGTAGCTAATTCCCACAATATGACACC,<br>CTGAGTGGATGGCTCCAGAA        | yes | yes |
| LCR_2016 | long  | GCTAGCGTGTCTGAAACCTGT,<br>TCAAGCTTAGAAGGCAGTTCTTG           | yes | yes |
| LCR_2024 | short | ACAACAGGTTTCATTAACCTACAAGAGTCC,<br>GGTTTGCGCTTTCTTTCTTGT    | yes | yes |
| LCR_2051 | long  | GAATTGTGGCGCATGTGTAG,<br>CCACGAGGTATGTGCCAATC               | yes | yes |
| LCR_2071 | long  | GTCTTGATGCTGTCGTCTTCC,<br>AGGTCCTCACAAAGTAGAGCAGA           | yes | yes |
| LCR_2102 | long  | CACCACATCTTGTTGCCATTTA,<br>TTACAGGTGAGGAATGGAAGTG           | yes | yes |
| LCR_2111 | short | CGCATGAAACCGTGCAAT,<br>TAAACGGTATTGAAATTGTAGGTTGG           | yes | yes |
| LCR_2117 | short | GCGATTGCGTTGATCTGC,<br>TACCGCTTACTTCAATGTTACGCTAC           | yes | yes |
| LCR_2161 | long  | CTTCCTTGGCGATTTCTGGTA,<br>GTTGATGCTGAGAAGCGGTTA             | yes | yes |
| LCR_2181 | long  | AGGTACGTTTCTTTGTTCTTTTG,<br>TATAACAGAAGTGAACCTTTAGGAAGC     | yes | yes |
| LCR_2290 | long  | CGCTGCCATGGGATAAAA,<br>AGATCCTGATGTTACTACCAAGTGCTT          | yes | yes |
| LCR_2298 | long  | CCTGTTTCCGATGTACCTCCT,<br>AACGTTGTTCTTCGCCAATC              | yes | yes |
| LCR_2360 | short | TGAGATAGAGAGAAACAAAGAAGATGA,<br>GACCACAAAAGTTGAGTGAGTGG     | yes | yes |
| LCR_2369 | long  | AGGTGGATCTTAAATAAGGACATGC,<br>TCAAAGGTGAATTTGGAAGCAA        | yes | yes |
| LCR_2408 | long  | GGTCTCGCTGATGCTTTTGT,<br>TGTATATAGAAAGACACAGGCTAACTCG       | yes | yes |
| LCR_2433 | long  | ACGGGCATATCTTCCAGAACT,<br>GTAAATATGTGCGAGACGAGATGTGA        | yes | yes |
| LCR_2435 | short | AGAATCTTCAACCACAAGTTACATAGAG,<br>AAGAGTGTACATGATGAAAGACCTAA | yes | yes |
| LCR_2459 | long  | TGCCTCAAGCCAGCATA,<br>CCGGCGTTGGATATGTCTAC                  | yes | yes |
| LCR_2506 | short | GAGATTGCTATATCCATTACCCTTAGAT,<br>TCACCTCCTCCATCTCCAA        | yes | yes |
| LCR_2523 | short | ACACCGTAAGAAGCGTGACG,<br>ACAAAATACCCCTTACGTCACCTC           | yes | yes |
| LCR_2532 | long  | TTTGTGATTGGTTTGGTTTGC,<br>TATCTTTGGATAAAGTTGAGGTTTCC        | yes | yes |
| LCR_2556 | long  | TATCCCGGTACAGCCATACCTT,                                     | yes | yes |



|          |       |                                                           |     |     |
|----------|-------|-----------------------------------------------------------|-----|-----|
|          |       | TGGCTAAGTGAAGTTTTGGTATTGTC                                |     |     |
| LCR_2564 | long  | AGGCTGGTCTGATTTCGTTGTA,<br>TCTAAACTCAACGCCAAGAAGAA        | yes | yes |
| LCR_2594 | long  | CTGTCAGAAGATGCAGTGGTAATG,<br>GGGCTTGGAGAAAGTCAAACCTC      | yes | yes |
| LCR_2599 | long  | TGAGCAAAGCGGAGGATG,<br>AATGGGCTATTGGGCTTTATGA             | yes | yes |
| LCR_2685 | short | GGGCCCATAACAATTGGTCTT,<br>TTTTCCCAGAAGATAAGTAAATTAGGG     | yes | yes |
| LCR_2691 | long  | TAACCCCTAATCACCATGAAGC,<br>TCCCTTCATCGCCTTATTAC           | yes | yes |
| LCR_2705 | long  | TGATGCTGAGGTTTCTTCTTCA,<br>CTTTACGAGACAAGAGAACATGGA       | yes | yes |
| LCR_2709 | short | TTGCTCTTACTGGACCAAACC,<br>AGCCCAATCAAACTAGATTCACT         | yes | yes |
| LCR_2717 | long  | CTGACCAGTTTGAGGCCAAG,<br>GAAACTTCAATCCCCAAAACC            | yes | yes |
| LCR_2727 | short | CATGCGCAACGAAGAAGC,<br>CTCTCTGCAGTGGCTCTGACTA             | yes | yes |
| LCR_2736 | long  | AGTCAACATTCACAAGCCCAT,<br>CACATCGCGCTGAAGAGTT             | yes | yes |
| LCR_2750 | short | TCCGGTGTTCCCTCTCTT,<br>TGTCAAACATAGAGTGTGAGAGTGAGAT       | yes | yes |
| LCR_2768 | long  | ATCTGTTGAAGATAAGGATTAACGATG,<br>GGTGGTCCTTGGACAATAGTATGA  | yes | yes |
| LCR_2817 | short | GGTATTTTCATGATGTTGTTGCTT,<br>TGATGTGTGTGAAGGAACTGC        | yes | yes |
| LCR_2883 | short | GAGCAGAAAATCGACGCTCAT,<br>GATTCTCCCTTTCGAGCATAAAT         | yes | yes |
| LCR_2968 | short | CTCCTGAGCCCTGCACTAA,<br>TGCACTCAATATCATCAATTACCG          | yes | yes |
| LCR_2990 | long  | AAAGGTATCTCTAGACACTGCACCA,<br>GATTCCACAATGAAGCGTTTG       | yes | yes |
| LCR_3006 | short | TTTTAAGTCATCACCAATCATGG,<br>TATAATTTTCAAGTGGAGGAAGCA      | yes | yes |
| LCR_3150 | long  | TGATAGTGATAAAGACGGTGGTAGTT,<br>GGTCACACACGGTTTCAAAGAT     | yes | yes |
| LCR_3169 | long  | TTCATCTCCTCCAGCATCTTTC,<br>GAAAACGTCAATTTCACTCTCTTTG      | yes | yes |
| LCR_3233 | short | GGCCCTGACTTTGAGGCTAT,<br>ACTACTCTGTATTATAGCTGCTGCAAGG     | yes | yes |
| LCR_3252 | short | TAAACAATCGTAATTGCTTGATGG,<br>ACAAGAAAATCTCACACAGATAACTAGC | yes | yes |
| LCR_3258 | long  | ATCCTGGTATTACAGAGGCAGACC,<br>CTTACCTTAAGACACAGAGCAACCA    | yes | yes |
| LCR_3268 | long  | CTGGTTTTCTTCCACCAACTCA,<br>TAGTCAACATTGGAACCTCAGGACA      | yes | yes |
| LCR_3269 | short | CTTAGCAAGAAGATCAGCATTATCG,<br>AAGTTAGTGGAATAGATGTGATGGTG  | yes | yes |
| LCR_3271 | long  | TGTTGACTTTAAGCTTCTGTTGTTTAG,<br>CGACGCATGAATAGGGATG       | no  | NA  |
| LCR_3298 | short | ATCTTTTCGATGTCCGCTTC,<br>CTCATTATTCAATACATAGTCCACACG      | yes | yes |
| LCR_3308 | long  | AGCTTCTAACTTCCTCACACCGTA,<br>GAATTAGTAGAGACTTGGTTTGGAGAAT | yes | yes |
| LCR_3341 | long  | GACTCGACTCTTGCTCGTACTTG,<br>CAAGCTAAAGCCTTGGAGCAC         | yes | yes |

|          |       |                                                              |     |     |
|----------|-------|--------------------------------------------------------------|-----|-----|
| LCR_3369 | long  | AGGACTTATCCTGCTCAAAGACG,<br>CTTACGCAAGATGGTATGCTCTC          | yes | yes |
| LCR_3400 | long  | CACATTCTTCTCTGCCAGGTTT,<br>CTCACCGTCAGGAGGAGTTAGT            | yes | yes |
| LCR_3417 | short | TCACTAATACTAGTAACCTCCAATCC,<br>AGACGGCACCGTTTTCTGT           | yes | yes |
| LCR_3427 | long  | AAATCCGTCTCTCGGCTAACTC,<br>CACTTAAGATCTGTTACCCTGCTATG        | yes | yes |
| LCR_3468 | long  | CAGTGTCTTGCTTTTGCAGAATTAG,<br>CATTGTGGTTGACGGTACGTAAG        | yes | yes |
| LCR_3482 | long  | AGACAGCAATTAAGCAGCATCG,<br>TTTTAAGCTGGTCTGGGTTG              | yes | yes |
| LCR_3488 | long  | TCGCGAATCTCGCACCTAT,<br>AGAAATTAACCTGAAAACGAACCA             | yes | yes |
| LCR_3539 | long  | TTTTGGTCGACAGCTTATGTTACTG,<br>GATCTGTATCTTGGCCACGTTCT        | yes | yes |
| LCR_3542 | long  | TTTTGTATCAGATGGTGCACAAAG,<br>CCAGTCTGACCGATTATCACAC          | yes | yes |
| LCR_3552 | long  | AAGATGGTACTACTTGCACTACAACCTCC,<br>TTATCTTTGTGCTGCCAACATCT    | yes | yes |
| LCR_3555 | long  | CTGAAATCTTGCCTTGGGATCT,<br>CTGAGAGACGGCTTCTAGCAAA            | yes | yes |
| LCR_3556 | short | ATTTGTTTAAGGTATTGATGCCACTCT,<br>AGCAAGCGCCATGGAAATA          | yes | yes |
| LCR_3646 | short | TGAGTAGTCTTTTGTTGACTGCTAGTTC,<br>GGTGATCTTTCTTACATTTATGCAATC | yes | yes |
| LCR_3744 | short | GTAATGGGTAAGGCTATTTTCAAGATGT,<br>GCATGGCGTAAAACTCGCTAT       | yes | yes |
| LCR_4003 | long  | ACTTATCATTGTCTCCCGCTTC,<br>CAAGTGTTGCAGGATTGAGC              | yes | yes |
| LCR_4017 | long  | AGGACACGAAATAGATGGGTATTTT,<br>TGGGCGAGGCTCTCATTA             | yes | yes |
| LCR_4048 | short | ACTAAATAATCTACCCGGTCCAAAC,<br>CTGAGGCTACAATCGGCATC           | yes | yes |
| LCR_4078 | short | CTCATTCCGATTTAGATTTCTAGGG,<br>AAACGAATCTTCCTTCCTTCTTC        | no  | NA  |
| LCR_4089 | short | GAGAATTGGCTTTATATACTCACAATGG,<br>TCAAGCATGTCCTTGTCAAA        | yes | yes |
| LCR_4102 | short | TGAGTACATAGGTTTAAATGAGCAATC,<br>ACAATGGTTTGAATCTCATACGTG     | yes | yes |
| LCR_4163 | short | ACTTAGTCAAGCTTCGGAATAATCA,<br>GGCAGCCTCATCACTGAAA            | yes | yes |
| LCR_4174 | short | TTATCTCGAAACAAACGTTGCAG,<br>GACTTGGAATTTAAGCAAGAGACC         | yes | yes |
| LCR_4189 | short | TCGTATTCAATCTCAATTCAAGTCCT,<br>CTTAAGAATTTGTGTTGGTTTCTGG     | no  | NA  |
| LCR_4217 | short | GACTTTATTACAACATCATGGCTTTTC,<br>ATGAGCATCATTTGGTTTCTGG       | yes | yes |
| LCR_4223 | long  | CCCTCAATCGCCCATTTT,<br>TCCGAATTCAGTAAGGATGTTAGA              | yes | yes |
| LCR_4233 | short | TGGTTCCCGGTGTGAAGA,<br>CCAGAATGAGGTTTTAGCTGATAGTT            | yes | yes |
| LCR_4323 | short | GAGTCAAAGGAGAATGGGGAAT,<br>AAAACGGCCCTAGCTGGTT               | yes | yes |
| LCR_4360 | short | CTACACATGAGAACGTGGGTAAAG,<br>ACAGCCAAGCAACGACCA              | yes | yes |
| LCR_4383 | short | CACATTTCTAAATTTCTGACCAACTTC,                                 | yes | yes |

|          |       |                                                             |     |     |
|----------|-------|-------------------------------------------------------------|-----|-----|
|          |       | ATTCTCATATTTACTTCGGCACCA                                    |     |     |
| LCR_4425 | short | CTGAGAATGGATATGCTTTAACACC,<br>TACCATGGATCTCAGTAAGGCAAC      | yes | yes |
| LCR_4512 | long  | TCTCCGTATCCCTCTTGACCTT,<br>AGAAGATTAGGCTGCACACGAC           | yes | yes |
| LCR_4577 | short | GATTATCCACAACAATGGCTACG,<br>TTGCACCAGCTCTCCTGTAA            | yes | yes |
| LCR_4605 | short | GAGAAGCTGTGGGACGGAAT,<br>TAGGTTGATACACTTAGCAATTGAACAC       | yes | yes |
| LCR_4673 | short | AGAGTCTGTAAACGAGATAAGCCAGA,<br>ATCTGTTCAATGCGATGGAAGT       | yes | yes |
| LCR_4705 | short | CAAGTTCTTGAACCCCGTAGG,<br>ACCTCCCACCTTGTCTTCGT              | yes | yes |
| LCR_4789 | short | AAGTATTAGCAGACGGACCTCCTTT,<br>ATATTA AAACTCCCAACTTCGAGAGAG  | yes | yes |
| LCR_4878 | long  | TTGCAGAAGAGTGGAACGAGT,<br>GTTTCACCGTTCAAGGATG               | yes | yes |
| LCR_4879 | long  | GAGTGAGGCATCAATTCGGTTA,<br>ATTGCTAATTGTATGTTTTGTAGGTG       | yes | yes |
| LCR_5043 | long  | GCATTGTCTTCTGCGTAGTAAATC,<br>GATCACTAATGTGTGTTACCTCAA       | yes | yes |
| LCR_5083 | short | CATTGAGATTAGATTTGTGTGTGTCAG,<br>ATGGATACCAGACACGATCATAGG    | yes | yes |
| LCR_5152 | short | AATTTGTCTGGGTATGAAAATACACTC,<br>GTCCTTCATTTGTTAGGAACTTATGTC | yes | yes |
| LCR_5153 | short | ATCTAAGTTCTGACAAGTTTCTGTTACG,<br>TATGAGATCTGCACAGAACAATCA   | yes | yes |
| LCR_5160 | short | TCTCTGCAAGAAACCTACTGTGA,<br>ATCTAAAAGCCAACTCAGCCAAC         | yes | yes |
| LCR_5265 | short | TGGAAATTGGAACAACAATGG,<br>TTTGGTCGATCATCTTGCA               | yes | yes |
| LCR_5278 | short | AGATGTGACTGAATCTAGAGCACGA,<br>ACACTTGTGCAAAATGGCTACTCA      | yes | yes |
| LCR_5397 | long  | CTCGCTGCTTCTGCGATAA,<br>ACGATCAATGCCAGGTTTGT                | yes | yes |
| LCR_5646 | short | TAGAATATGACATTTGTGCCTACTTTC,<br>CCGTCGAGAAAGTTAAGAGCTTC     | yes | yes |
| LCR_5715 | long  | ACTAATTGGTGCCGCGTATCTA,<br>TGGGAAGACGCAACCGTA               | yes | yes |
| LCR_5894 | long  | CAGAGGGCGATTACGATGAA,<br>TCGATTGAAGGTATTAGATAAGGAAAC        | yes | yes |
| LCR_5903 | short | GTTTACAGAATTGGGACATTGGA,<br>CGTAAAATCAAAGTCGTCCTCTAAC       | yes | yes |
| LCR_5918 | short | TTTACAGGAGACAAAAGGGATCG,<br>ACCTCCATCAAGAACTTCAAGAAA        | yes | yes |
| LCR_5943 | short | AACTCGACACACATCAACGTTAAATA,<br>AGAGTCTTAGTGTTTTACATCAACTTCG | yes | yes |
| LCR_5980 | short | TTCGAAACCCCAATCTGTATGT,<br>GGTTTGTTGGGTTACTTAGCTTTT         | yes | yes |
| LCR_5999 | short | GAACCGAGCCAGTAAGGTCA,<br>TTCTTGTTTTGGTAGCTTCAGTT            | yes | yes |
| LCR_6108 | short | CACTTCTCAAGTTATCGTTCTTTCATT,<br>TTATGCAGCGAGTGCATGG         | yes | yes |
| LCR_6394 | long  | AGGAGCAAATATTGCGTGTGAT,<br>GATATCTCTCTACGCTCCTTCTGT         | yes | yes |
| LCR_6442 | long  | TCAAATCCGTTCCCTTTGTCTCT,<br>CCCTGTCAATCTCTTTGCTTG           | yes | yes |

|          |       |                                                            |     |     |
|----------|-------|------------------------------------------------------------|-----|-----|
| LCR_6476 | short | TCCGCTTCAGCTCGTTTCT,<br>ACCAACAAATCCTCGCCATTA              | yes | yes |
| LCR_6490 | short | GAAATAAATCTTTCGGAGAATACCC,<br>AAAAGGGGGCCCACCACTTA         | yes | yes |
| LCR_6515 | short | TATCTCCGTTCTATTTGATGGAGT,<br>TAAGAATACCGTTGTCAGTTAAACCA    | yes | yes |
| LCR_6586 | short | TGGCAATGTTCCCTAGTTCCATAG,<br>TCGACCTGAAAGAATGGAAGAA        | yes | yes |
| LCR_6605 | short | GTGGTTGCCAACTCAAAGC,<br>CACAAGTGCATTACCGAAC                | no  | NA  |
| LCR_6641 | short | GCTTTCTCTGTCAACAATAAAATGAAC,<br>AGTTTTACACTAACCAAAACCGAAC  | yes | yes |
| LCR_6668 | long  | CCACCTTGTTTTCTCCATCC,<br>AAAAGATTTCATGATTGCTCTGCTT         | yes | yes |
| LCR_6698 | long  | ATCCTCATATCATAAAGTTGAAGGAGA,<br>TATAAGACATTCAAAGAGCGAAAACC | yes | yes |
| LCR_6713 | short | CTCAAATCACACGCCTCGTT,<br>GTATGAGGAGCCTCGAGATTGTT           | yes | yes |
| LCR_6714 | short | CAATTGTGGCAACACATATCCA,<br>GATGATTGTGCTGTTTTGTTTGA         | yes | yes |
| LCR_6748 | short | GCCTACCACTAATGGCATAACA,<br>CAACAAGGACCTGAAGATCCAC          | yes | yes |
| LCR_6749 | short | ATATCTCGTCGCAGACTCCATAA,<br>ATTTCTCAGGTCATGATCAAACCTCA     | yes | yes |
| LCR_6768 | long  | TGTTGTTGTCTGGAGCTATTTGA,<br>TAATGATTGTGAATGAACCAACG        | yes | yes |
| LCR_6777 | short | ACTGACCCAGCTGCTTGATTT,<br>AACTTGAGAACTATATCATTCCATTGC      | yes | yes |
| LCR_6906 | short | CTTTGCTTTATTTTCGACGACTTTT,<br>TGGACAATACATACAATTCTGAAGC    | yes | yes |
| LCR_6964 | short | GTGCTGTCATCTTCGCCTTC,<br>ATTATGCTTACCACGAACAAAGC           | yes | yes |
| LCR_7007 | short | TGATTATGGTTTTGTCTCCACCT,<br>GTACAAATGTGTTGAAATTCTATCGAG    | yes | yes |
| LCR_7021 | short | CCTCGTTGGCAGTAGTGGTT,<br>TTTTCGGGATGCGAGGAT                | yes | yes |
| LCR_7087 | short | ACTGGTAGGTCCATTTTATCCTATACC,<br>GGTGTCTCAAGGCTTCTTGTTTC    | yes | yes |
| LCR_7169 | short | GGTGGACATGTACGGTGGTA,<br>GTTGACTACAACCCTTCACCAAG           | yes | yes |
| LCR_7221 | short | AAACTAGCAGAACGTAAGCAAGGT,<br>GGACTGCTATGGCTCATCCT          | yes | yes |
| LCR_7236 | short | TCGTCTTCTTCCCAGCCTTT,<br>TGATCAGAGGTTTGGTTTCTTCT           | yes | yes |
| LCR_7358 | long  | CTAGGATGGTAACCTTGTAACCTATG,<br>GGGGAACTATTTGTTGAAGAGC      | yes | yes |
| LCR_7377 | long  | TCTTTATGCCATTGTAACCTCAGGTAAT,<br>CAACTTCTGTCTGAACCGGACT    | yes | yes |
| LCR_7380 | short | TGTGACGAGGCTGCAGAA,<br>CATCTTGTTCTTAGATAACCCCTCTT          | yes | yes |

<sup>a</sup>See data release at <http://1001genomes.org> for the position of contig sequences in the reference genome.  
NA, not applicable.

**Table S8.** Polymorphisms detected by accession in alignments of anchored contig sequences to the reference genome sequence.

| Type       | Length<br>(bp) | Accession |        |       |                                  |
|------------|----------------|-----------|--------|-------|----------------------------------|
|            |                | Col-0     | Bur-0  | Tsu-1 | Bur-0 & Tsu-1<br>(non-redundant) |
| SNPs       | NA             | 28        | 13,599 | 6,997 | 19,283                           |
| Deletions  | All            | 10        | 5,830  | 2,752 | 8,082                            |
|            | 1-3            | 10        | 2,233  | 1,062 | 3,122                            |
|            | 4-10           | 0         | 2,181  | 991   | 2,953                            |
|            | 11-50          | 0         | 1,212  | 594   | 1,710                            |
|            | >50            | 0         | 204    | 105   | 297                              |
| Insertions | All            | 22        | 4,970  | 2,228 | 6,681                            |
|            | 1-3            | 17        | 1,981  | 971   | 2,772                            |
|            | 4-10           | 2         | 1,858  | 795   | 2,442                            |
|            | 10-50          | 3         | 1,009  | 434   | 1,326                            |
|            | >50            | 0         | 122    | 28    | 144                              |

NA, not applicable.

**Table S9.** Regions with an elevated coverage and their support by CVPs.

|       | Elevated coverage regions |          |                  | Elevated coverage regions<br>with 1 or more CVPs |          |                  |
|-------|---------------------------|----------|------------------|--------------------------------------------------|----------|------------------|
|       | <i>n</i>                  | Total bp | Mean length (bp) | <i>n</i>                                         | Total bp | Mean length (bp) |
| Col-0 | 687                       | 199,103  | 289.8            | 23                                               | 11,612   | 504.9            |
| Bur-0 | 1,466                     | 554,443  | 378.2            | 757                                              | 332,150  | 438.8            |
| Tsu-1 | 1,278                     | 498,614  | 390.2            | 872                                              | 363,575  | 416.9            |

**Table S10.** Major-effect changes by type in coding sequences with the number of distinct coding genes affected.

| Type <sup>a</sup>             | Bur-0    |                | Tsu-1    |                | Non-redundant   |                 |
|-------------------------------|----------|----------------|----------|----------------|-----------------|-----------------|
|                               | <i>n</i> | Genes affected | <i>n</i> | Genes affected | <i>n</i>        | Genes affected  |
| Premature stop                | 446      | 389            | 416      | 366            | 764             | 651             |
| Stop codon to coding          | 159      | 153            | 135      | 129            | 225             | 216             |
| Loss of initiation methionine | 30       | 30             | 32       | 32             | 48              | 48              |
| 1-2 bp indel (frameshift)     | 605      | 515            | 573      | 477            | 1,027           | 833             |
| 1-2 bp insertion (frameshift) | 523      | 441            | 460      | 407            | 812             | 682             |
| PR of ≥100 bp                 | 1,282    | 634            | 1,098    | 559            | ND <sup>b</sup> | ND <sup>b</sup> |
| All large-effect changes      | 3,045    | 1,871          | 2,714    | 1,694          | ND <sup>b</sup> | ND <sup>b</sup> |

<sup>a</sup>Polymorphisms detected in Bur-0 and Tsu-1 from read alignments (cf. Tables 4 and 5).

<sup>b</sup>Non-redundant PRs could not be determined (ND). PRs identify intervals corresponding to polymorphic sequences, but whether PRs in different accessions at the same locations reflect identical underlying sequence difference cannot be directly assessed.

**Table S11.** Distribution of major-effect changes by gene family for Bur-0.

| Gene Family      | <i>n</i> | Total coding bases | All major-effect changes | Affected genes (count) | Affected genes (ratio) | Major-effect changes / CDS bases <sup>a</sup> |
|------------------|----------|--------------------|--------------------------|------------------------|------------------------|-----------------------------------------------|
| Ribosomal        | 411      | 218,805            | 9                        | 6                      | 1.5%                   | $4.1 \times 10^{-5}$                          |
| bHLH             | 117      | 124,233            | 3                        | 3                      | 2.6%                   | $2.4 \times 10^{-5}$                          |
| MYB domain       | 141      | 143,877            | 5                        | 5                      | 3.6%                   | $3.5 \times 10^{-5}$                          |
| Cytochrome P450  | 246      | 362,802            | 54                       | 31                     | 12.6%                  | $1.5 \times 10^{-4}$                          |
| F-box            | 679      | 802,338            | 175                      | 128                    | 18.9%                  | $2.2 \times 10^{-4}$                          |
| NBS-LRR          | 121      | 378,939            | 146                      | 52                     | 43.0%                  | $3.9 \times 10^{-4}$                          |
| All coding genes | 26,819   | 33,156,064         | 3,045                    | 1,871                  | 7%                     | $9.2 \times 10^{-5}$                          |

<sup>a</sup>If an appreciable fraction of major-effect changes result from erroneous predictions, larger genes would be proportionally more likely to harbor such changes. Although gene size varies systematically by family, e.g., NBS-LRR genes are on average 5.9 fold larger than ribosomal protein family members, the incidence of major-effect changes per coding base per family nevertheless varies more than 10-fold.



**Table S12.** Distribution of major-effect changes by gene family for Tsu-1.

| Gene Family       | <i>n</i> | Total coding bases | All major-effect changes | Affected genes (count) | Affected genes (ratio) | Major-effect changes / CDS bases <sup>a</sup> |
|-------------------|----------|--------------------|--------------------------|------------------------|------------------------|-----------------------------------------------|
| Ribosomal protein | 411      | 218,805            | 4                        | 4                      | 1.0%                   | $1.8 \times 10^{-5}$                          |
| bHLH              | 117      | 124,233            | 2                        | 2                      | 1.7%                   | $1.6 \times 10^{-5}$                          |
| MYB domain        | 141      | 143,877            | 3                        | 3                      | 2.1%                   | $2.1 \times 10^{-5}$                          |
| Cytochrome P450   | 246      | 362,802            | 39                       | 23                     | 9.4%                   | $1.1 \times 10^{-4}$                          |
| F-box family      | 679      | 802,338            | 164                      | 116                    | 17.1%                  | $2.0 \times 10^{-4}$                          |
| NBS-LRR           | 121      | 378,939            | 158                      | 50                     | 41.3%                  | $4.2 \times 10^{-4}$                          |
| All coding genes  | 26,819   | 33,156,064         | 2732                     | 1,694                  | 6.3%                   | $8.2 \times 10^{-5}$                          |

<sup>a</sup>If an appreciable fraction of major-effect changes result from erroneous predictions, larger genes would be proportionally more likely to harbor such changes. Although gene size varies systematically by family, e.g., NBS-LRR genes are on average 5.9 fold larger than ribosomal protein family members, the incidence of major-effect changes per coding base per family nevertheless varies more than 10-fold.

## SUPPLEMENTAL FIGURES

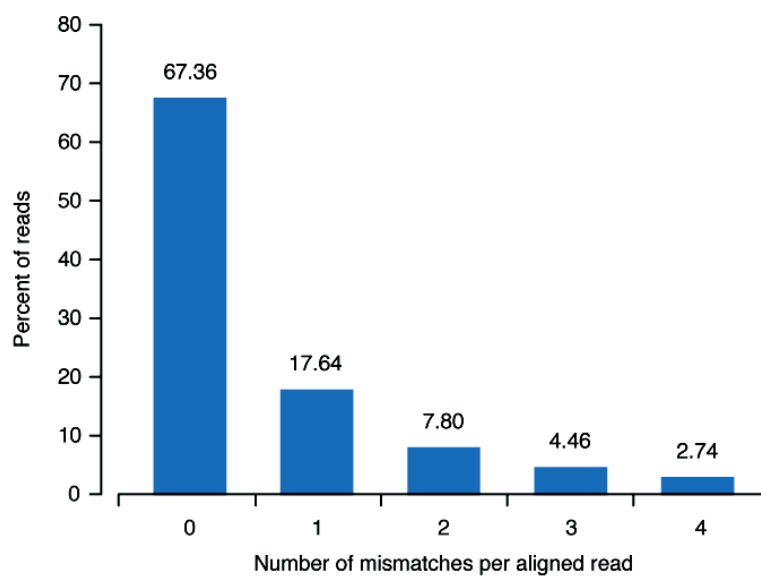

**Figure S1.** Mismatches per read as assessed with Col-0 alignments before applying base quality filtering. Only uniquely mapped reads were used in the analysis (n = 52,505,997).

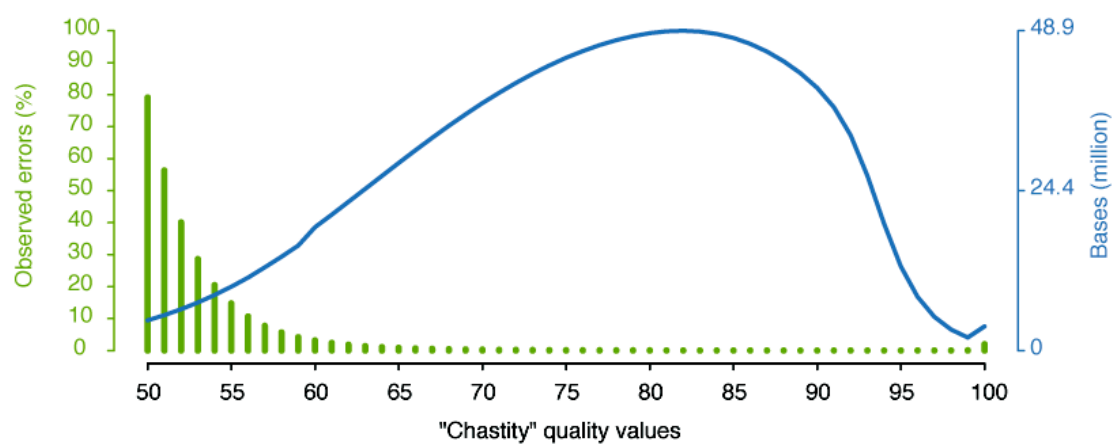

**Figure S2.** Observed errors at a given *chastity* value with the frequency spectrum for *chastity* values for all bases.

The data is from uniquely aligned Col-0 reads.

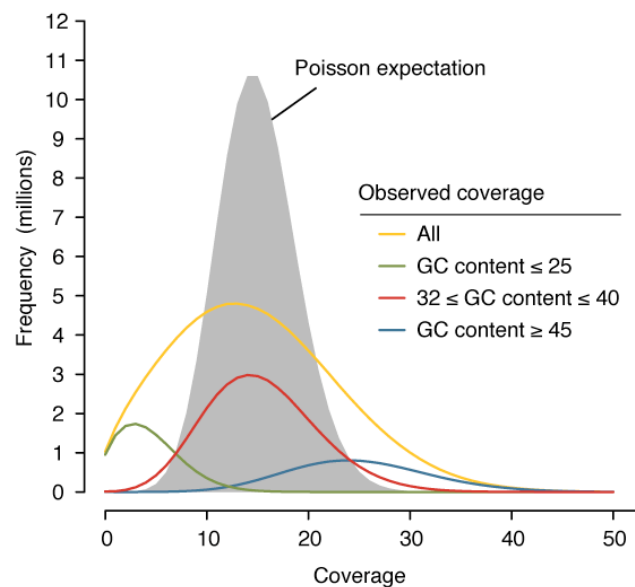

**Figure S3.** Random versus observed coverage in non-repetitive regions and the effect of GC composition. Data is from Col-0 with GC content assessed in 101 bp windows (see Fig. S4 for selection of window size).

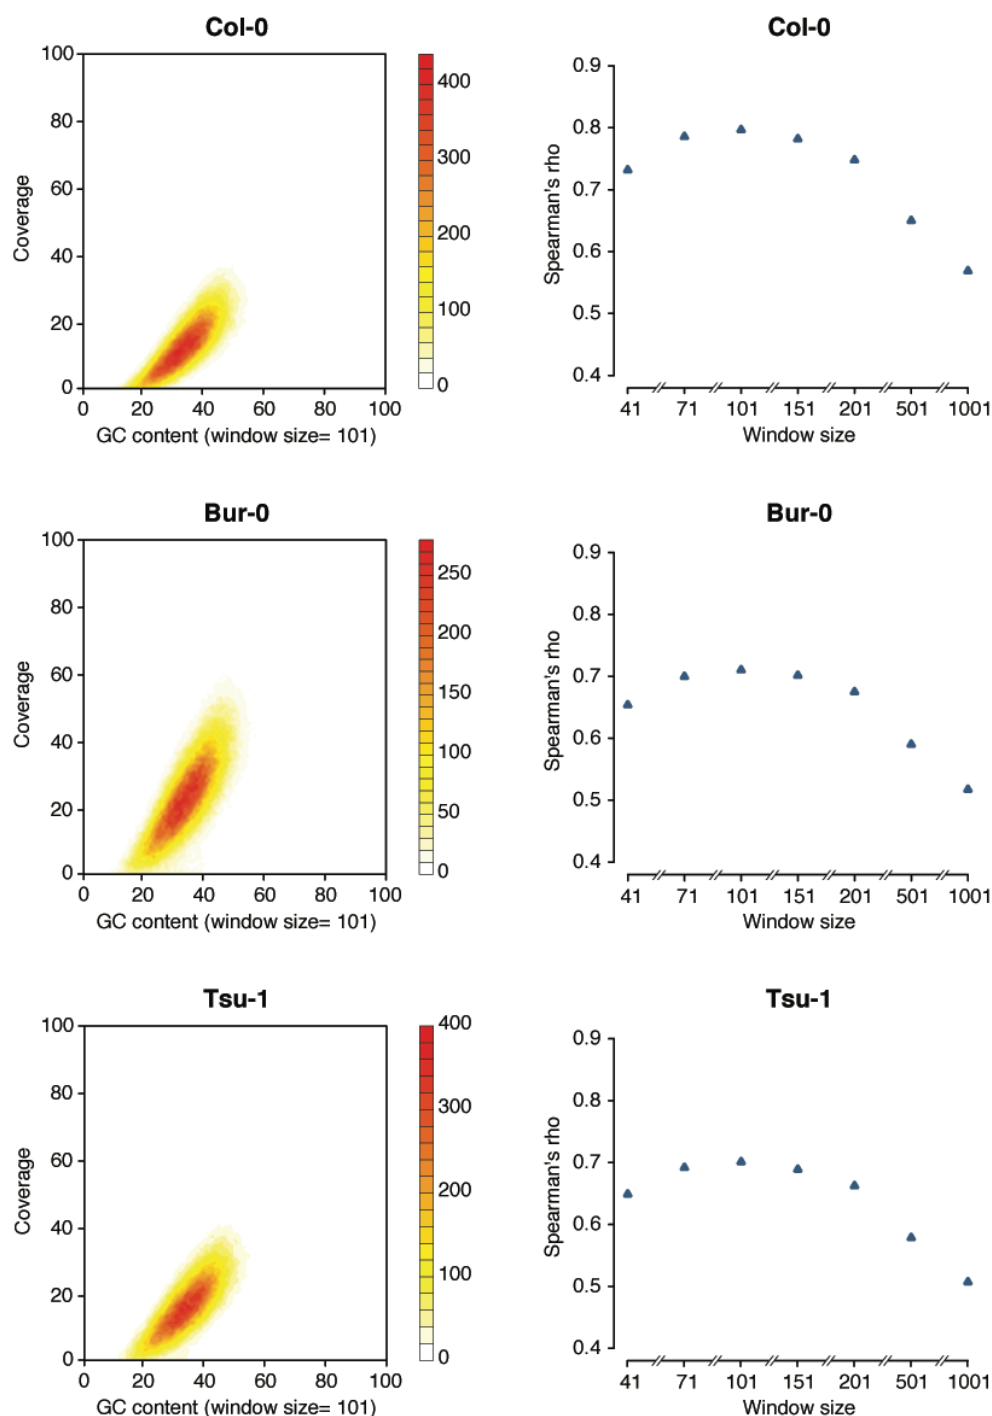

**Figure S4.** Correlation between GC content and coverage by accession at non-repetitive positions.

Contour plots (left) reveal the relationship between GC content in a 101 bp window and coverage. As assessed with Spearman's rank correlation coefficient (Spearman's  $\rho$ ), the strongest correlation with local GC content was apparent with a 101 bp window (right; correlation coefficients were significant in all accessions with all window sizes at  $P < 10^{-10}$ ).

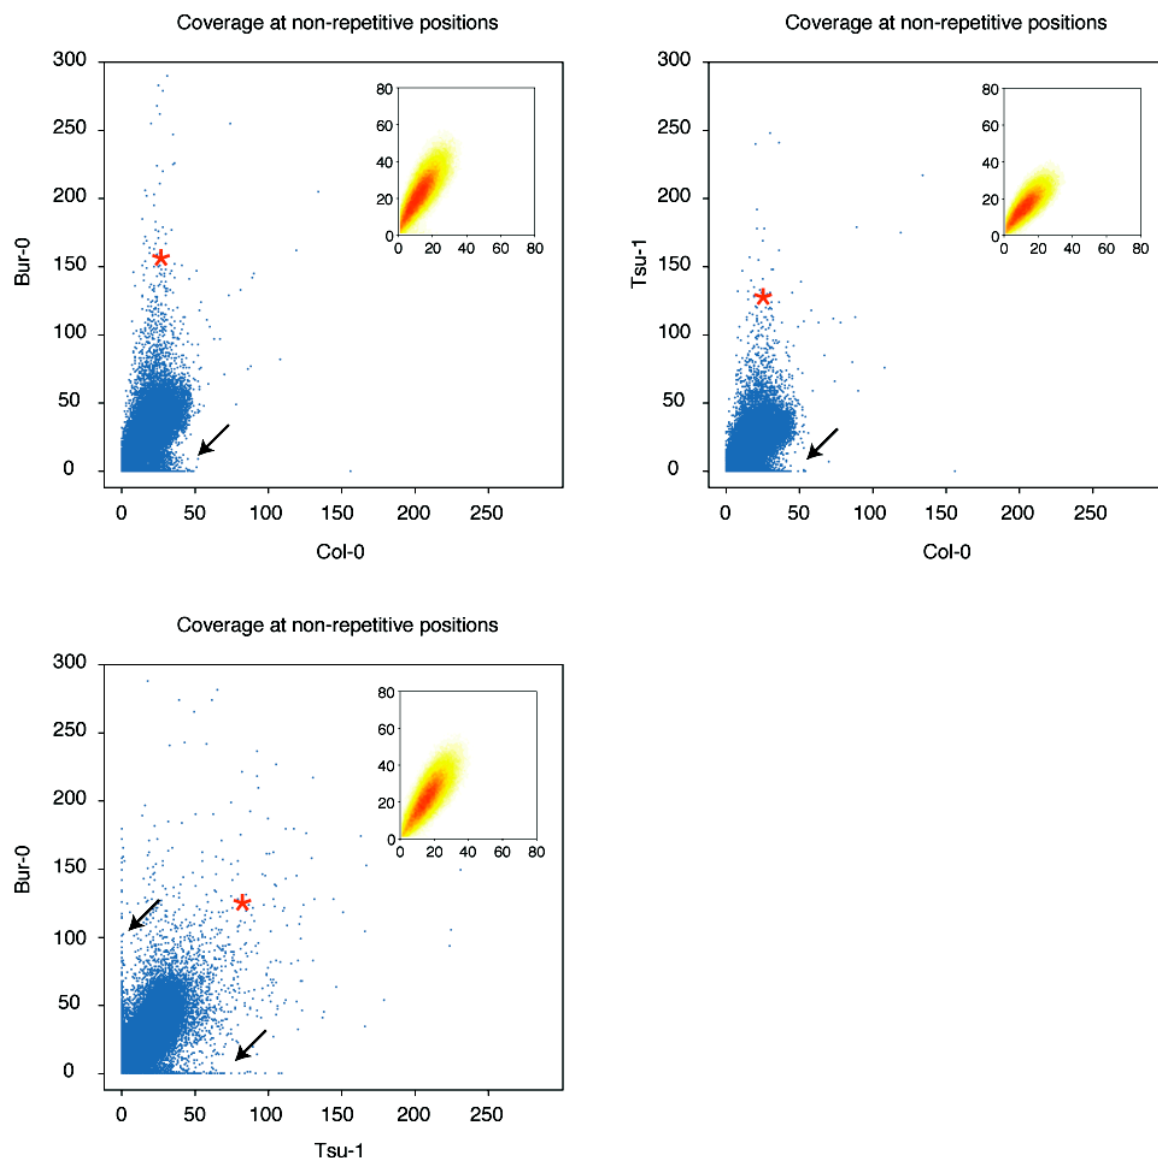

**Figure S5.** Pair-wise relationships for coverage among accessions.

Scatter plots are shown for each comparison, with contour plot insets for the regions of highest density (coverage less than 80). Although coverage is strongly correlated among data sets, regions of low or no coverage in a given accession identify potential polymorphic regions or deletions (black arrows). Conversely, potentially duplicated regions have proportionally higher coverage (red asterisks). The mean coverage depths per accession are given in Table 1.

|                    |                                    |
|--------------------|------------------------------------|
| <b>A</b>           |                                    |
| Reference sequence | ..TTTAGGAATAACAT--GTGCATCTTTAATC.. |
| Read_01            | ..TTTAGGAATAACATGCGTGCA            |
| Read_02            | ..TTTAGGAATAACATGCGTGCATCT         |
| Read_03            | ..TTTAGGAATAACATGCGTCCATCTT        |
| Read_04            | ..TTTAGGAATAACATGCGTGCATCTTTAAT    |
| Read_05            | ..TTTAGGAATAACATGCGTGCATCTTTAATC.. |
| Read_06            | ..TTTAGGAATAACATGCGTGCATCTTTAATC.. |
| Read_07            | ..TTTAGGAATAACATGCGTGCATCTTTAATC.. |
| Read_08            | AATAACATGCGTGCATCTTTAATC..         |
| Read_09            | TAACATGCGTGCATCTTTAATC..           |
| Read_10            | AACATGCGTGCATCTTTAATC..            |
| Read_11            | AACATGCGTGCATCTTTAATC..            |
| <b>B</b>           |                                    |
| Reference sequence | ..TTTAGGAATAACATGTGCATCTTTAATC..   |
| Read_12            | ..TTTAGGAATAACATGCGT               |
| Read_13            | ..TTTAGGAATAACATGCGTG              |
| Read_14            | TGCGTGCATCTTTAATC..                |
| Read_15            | CGTGCATCTTTAATC..                  |
| <b>C</b>           |                                    |
| Reference sequence | ..TTTAGGAATAACAT--GTGCATCTTTAATC.. |
| Read_12            | ..TTTAGGAATAACATGCGT               |
| Read_13            | ..TTTAGGAATAACATGCGTG              |
| Read_14            | TGCGTGCATCTTTAATC..                |
| Read_15            | CGTGCATCTTTAATC..                  |

**Figure S6.** Illustration of ambiguous alignments at read ends.

Alignments are shown for 15 reads that span or overlap a 2 bp insertion with red indicating mismatches or insertions in reads. For reads 1-11 that overlap the insertion at central positions, the alignments accurately reflect the polymorphism. However, reads 12-15, which terminate near the insertion, can be aligned with either mismatches (that suggest SNPs; B) or with gaps (C). Detection of polymorphisms from read mapping strategies that do not allow gaps, therefore, is likely to lead to a high false prediction rate. This is expected to be especially true when polymorphisms are inferred from low coverage data. As the potential for misalignments at central positions in reads is minimal, prioritizing central read alignment data is expected to drastically reduce the potential for false polymorphism predictions (see Methods). Note further that in polymorphic regions, few reads will map, and those that do are likely to have more mismatches owing to incorrect alignments; this motivated our approach to identify low coverage regions for targeted reassembly.

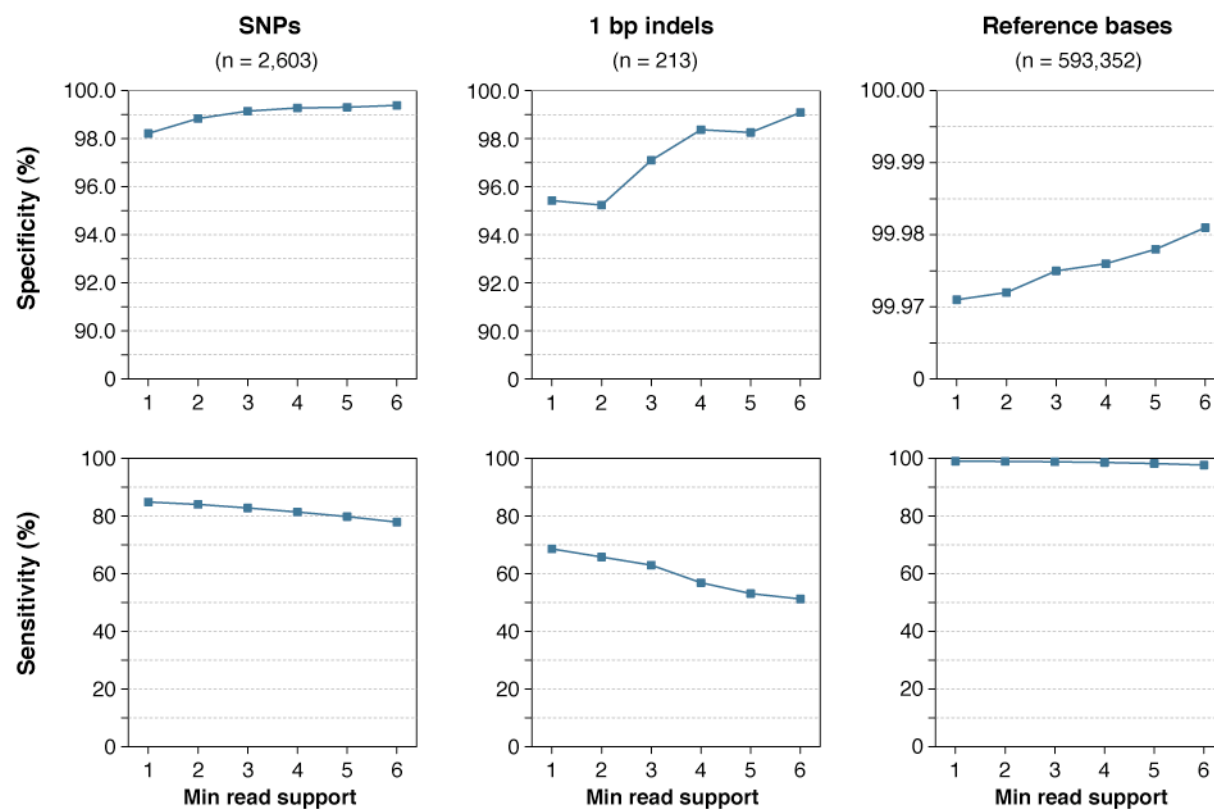

**Figure S7.** Performance evaluation for sequence predictions with all aligned reads for the Tsu-1 sequence data (cf. Fig. 2).



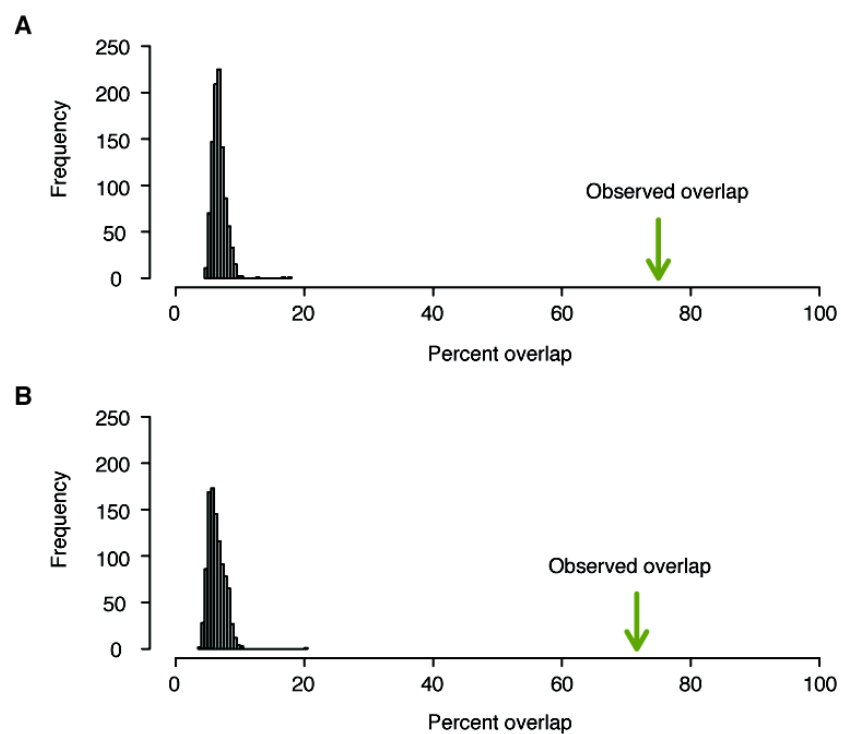

**Figure S8.** Expected distribution of per base overlaps of SBS PRs to resequencing PRs as assessed by permutation along with the observed values.

The observed overlap values for Bur-0 (A) and Tsu-1 (B) are indicated by green arrows (see Supplemental Methods).

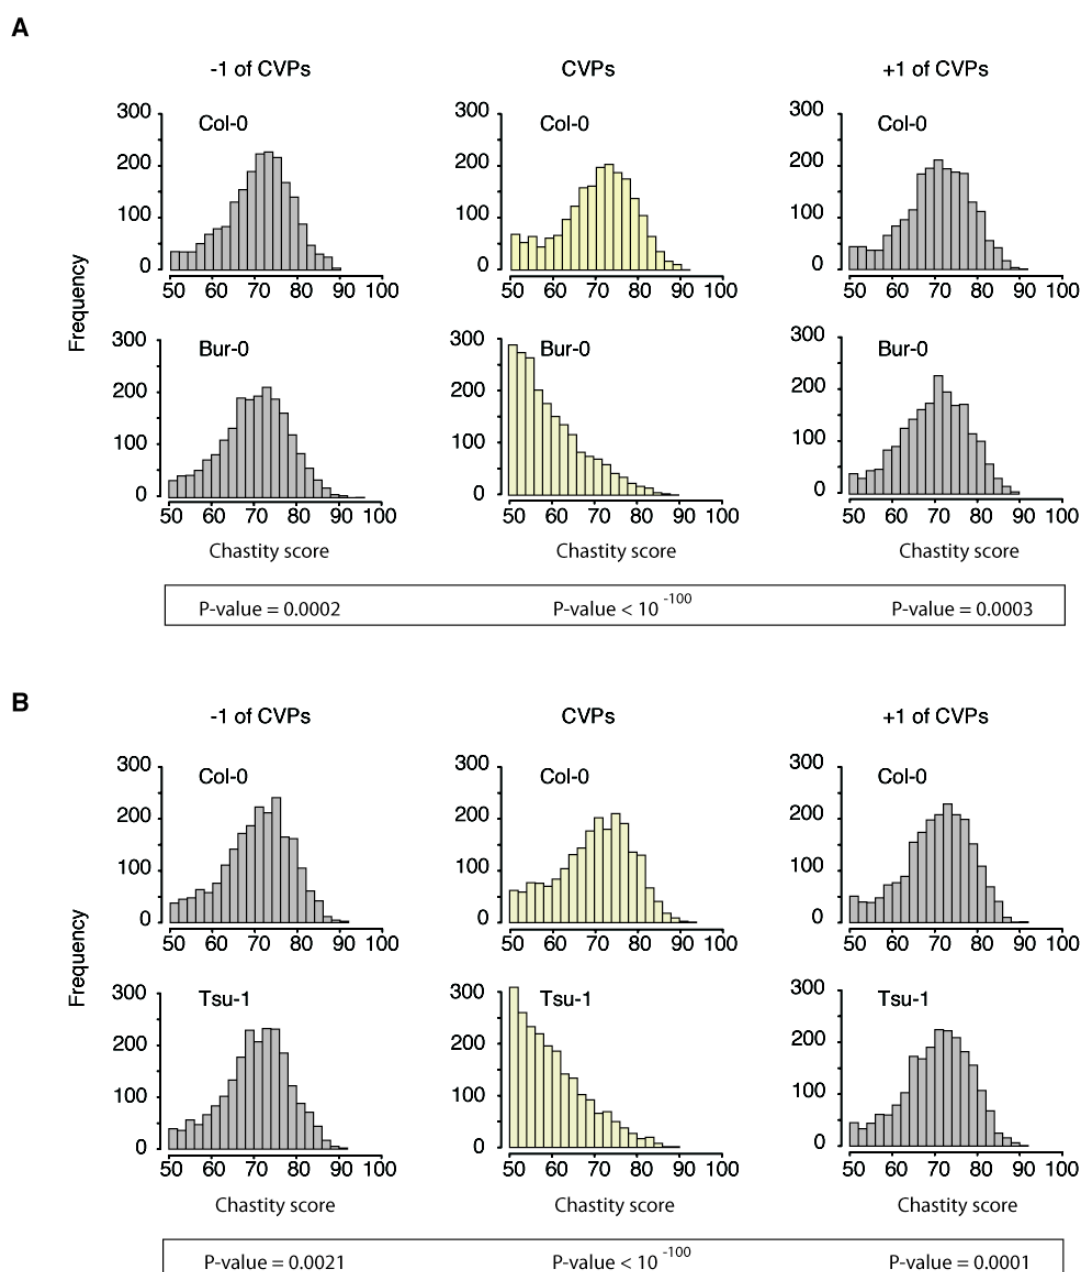

**Figure S9.** Resequencing array data *chastity* scores at and nearby CVPs.

CVPs in the resequencing array data for Col-0 compared to Bur-0 (A) and to Tsu-1 (B). Shown is the *chastity* score at CVP – 1, CVP (analogous to the yellow columns in Fig 4C), and CVP + 1. *Chastity* scores for both Bur-0 and Tsu-1 peak at 0.5 at CVPs while *chastity* scores for all positions in Col-0 as well as position -1 and +1 in Bur-0 and Tsu-1 peak at 0.75. The distributions for the -1 and +1 positions are significantly different as assessed by comparison of bin values with a  $\chi^2$ - test, potentially reflecting differences in hybridization quality among accessions in the array experiments. In contrast, at CVP positions, the differences in distributions in the Col-0/Bur-0 and Col-0/Tsu-1 comparisons are highly significant.
